# Supplementary material
Source: publisher figshare collection journal article supplement (https://gsajournals.figshare.com/ndownloader/files/18315203)
Supplement: Supplementary file 1 [file 18315203]

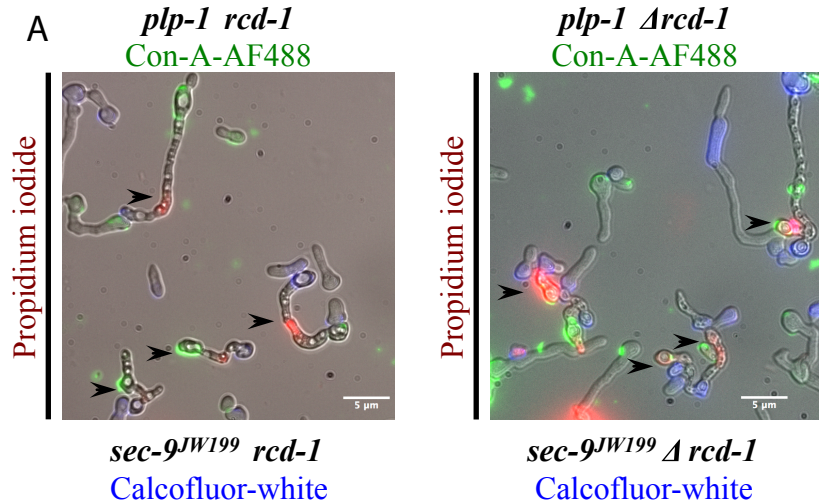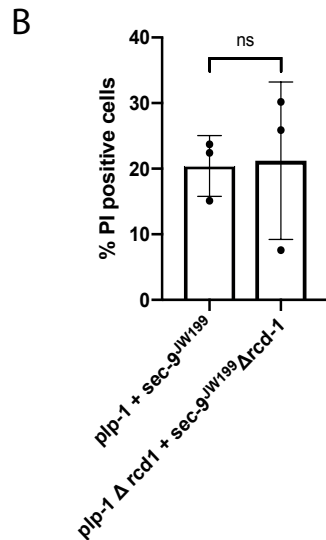

Figure S5. PLP-1/SEC-9 GRD incompatibility is not RCD-1-dependent. GRD reaction triggered by antagonistic PLP-1/SEC-9 alleles in presence (A) or absence (B) of RCD-1 revealed by the uptake of propidium iodide (red). Strains are stained with calcofluor-white (blue) or marked with Concavalin-A-coupled fluorochrome (green). Arrowheads show cells undergoing GRD, some of which are already stained with the vital dye (PI). Scale bars are 5  $\mu$ m. C. Flow cytometry quantification of the GRD reaction. ns – non-significant, unpaired T-test. Strains are indicated by their GRD-inducing genotype and the *rcd-1* genetic background is shown for all strains. The *sec-9* allele is shown in superscript (*plp-1*<sup>FGSC2489</sup> + *sec-9*<sup>JW199</sup>) for germlings undergo GRD following cell fusion
